# Supplementary material for: Identification of pH-dependent synergy on Ru/MoS2 interface: a comparison of alkaline and acidic hydrogen evolution
Source: Royal Society of Chemistry journal article supplement (doi:10.1039/c7nr06111k), 2017-01-01
Supplement: c7nr06111k1.pdf [file c7nr06111k1.pdf]

Electronic Supplementary Material (ESI) for Nanoscale.  
This journal is © The Royal Society of Chemistry 2017

## Supporting Information

### **Identification of pH-dependent synergy on Ru/MoS<sub>2</sub> interface: a comparison of alkaline and acidic hydrogen evolution**

Jinlong Liu,<sup>a</sup> Yao Zheng,<sup>a</sup> Dongdong Zhu,<sup>a</sup> Anthony Vasileff,<sup>a</sup> Tao Ling<sup>b</sup> and Shi-Zhang Qiao<sup>\*ab</sup>

<sup>a</sup>School of Chemical Engineering, University of Adelaide, Adelaide, SA 5005, Australia.

<sup>b</sup>School of Materials Science and Engineering, Tianjin University, Tianjin 300072, China

Corresponding Author: Shi-Zhang Qiao, E-mail address: [s.qiao@adelaide.edu.au](mailto:s.qiao@adelaide.edu.au)

## 1. Experimental Section

### 1.1 Materials

All chemicals (analytical reagent grade) used in this work, including  $(\text{NH}_4)_6\text{Mo}_7\text{O}_{24}\cdot 4\text{H}_2\text{O}$ ,  $\text{NaH}_2\text{PO}_2\cdot 4\text{H}_2\text{O}$ , thiourea, urea, KOH,  $\text{H}_2\text{SO}_4$ , Pt/C (20 wt.% of Pt on Vulcan XC72), Nafion (15 wt.%) were purchased from Sigma-Aldrich and used without further purification. Carbon paper (CP, AvCarb MGL 190, Product Code: 1594008) was bought from FuelCellStore. Ultra-pure water ( $18.2\text{ M}\Omega\cdot\text{cm}$ , PURELAB Option-Q) was used in all experiments.

### 1.2 Synthesis of Electrocatalysts

**Preparation of  $\text{MoS}_2/\text{CP}$ :** A piece of CP ( $2\text{ cm} \times 4\text{ cm}$ ) was washed thoroughly with ethanol,  $0.5\text{ M H}_2\text{SO}_4$ , and water in sequence under sonication for 1 h each time. The vertically aligned  $\text{MoS}_2$  nanosheets were grown on the cleaned CP via a facile hydrothermal approach. Typically,  $(\text{NH}_4)_6\text{Mo}_7\text{O}_{24}\cdot 4\text{H}_2\text{O}$  (0.088 g), thiourea (0.163 g),  $\text{NaH}_2\text{PO}_2\cdot 4\text{H}_2\text{O}$  (0.023 g) were added into 35 mL of deionized water under magnetic stirring to obtain a precursor solution, which was then transferred to a Teflon-lined stainless autoclave (50 mL) with a piece of pre-cleaned CP. Subsequently, the autoclave was kept in a preheated oven at  $180\text{ }^\circ\text{C}$  for 24 h. After the autoclave cooled down naturally to ambient temperature, the sample was collected and rinsed with deionized water several times, and then dried in a vacuum oven at  $60\text{ }^\circ\text{C}$  overnight.

**Preparation of  $\text{Ru}/\text{MoS}_2/\text{CP}$ :** The obtained  $\text{MoS}_2/\text{CP}$  was completely immersed into 20 mL of  $\text{RuCl}_3$  aqueous solution (5 mM) for 24 h. The product was collected and dried using compressed  $\text{N}_2$  at ambient temperature. To obtain the final product, the sample was then heated to  $250\text{ }^\circ\text{C}$  in a tube furnace at a rate of  $2\text{ }^\circ\text{C min}^{-1}$  and held at that temperature for 2 h under  $\text{H}_2/\text{Ar}$  flow. For the as-prepared  $\text{Ru}/\text{MoS}_2/\text{CP}$ , the mass increment of CP was about  $1.0\text{ mg cm}^{-2}$ . XPS quantification analysis revealed that the atomic percentage of Ru in  $\text{Ru}/\text{MoS}_2$  was  $\sim 15\text{ at.}\%$ , which converts to a Ru mass percentage of about 10%. Accordingly, the Ru loading for  $\text{Ru}/\text{MoS}_2/\text{CP}$  was  $\sim 0.1\text{ mg cm}^{-2}$ .

**Preparation of  $\text{MoS}_2$ :** Bare  $\text{MoS}_2$  was synthesized via a hydrothermal approach similar to that of  $\text{MoS}_2/\text{CP}$ . Specifically,  $(\text{NH}_4)_6\text{Mo}_7\text{O}_{24}\cdot 4\text{H}_2\text{O}$  (1.236 g), thiourea (2.284 g),  $\text{NaH}_2\text{PO}_2\cdot 4\text{H}_2\text{O}$  (0.318 g) were added into 35 mL of deionized water under magnetic stirring to obtain a precursor solution, which was then transferred to a Teflon-lined stainless autoclave (50 mL) without CP. Subsequently, the autoclave was kept in a preheated oven at  $180\text{ }^\circ\text{C}$  for 24 h. After the autoclave cooled down naturally to ambient temperature, the resultant precipitates were

collected by centrifugation, washed with deionized water several times, and then dried in a vacuum oven at 60 °C overnight.

**Preparation of Ru/CP:** A piece of pre-cleaned CP was completely immersed in 20 mL of RuCl<sub>3</sub> aqueous solution (5 mM) for 24 h. The following procedure was the same as the preparation of Ru/MoS<sub>2</sub>/CP. For the as-prepared Ru/CP, the mass increment of CP was ~0.31 mg cm<sup>-2</sup>, which was attributed to the Ru loading.

**Preparation of PtC/CP:** 5 mg of 20 wt.% Pt/C was dispersed in 2 mL of ethanol containing 0.15 wt.% of Nafion under ultrasound for 1 h. Next, 200 μL of the Pt/C dispersion was loaded onto a piece of pre-cleaned CP (1 cm × 1 cm) to obtain the PtC/CP electrode.

### 1.3 Characterizations

The morphology, structure, and chemical composition of the samples were characterized by field emission scanning electron microscopy (SEM, QUANTA 450) equipped with energy dispersive spectrometer (EDS), transmission electron microscopy (TEM, Tecnai G2 Spirit and JEOL 2100 Cryo) equipped with EDS, powder X-ray diffractometer (XRD, Cu-target Bruker D8 Advance), X-ray photoelectron spectroscopy (XPS, ESCALab250).

### 1.4 Electrochemical Measurements

Electrochemical measurements were performed on a 760D (CH Instruments, Inc., USA) in a standard three-electrode glass cell (Pine Research Instruments, USA). 1 cm × 1 cm Ru/MoS<sub>2</sub>/CP, MoS<sub>2</sub>/CP, Ru/CP, and PtC/CP were directly used as the working electrode. For MoS<sub>2</sub>, a glassy carbon rotating disk electrode (RDE, diameter: 5 mm) was employed. Specifically, 5 mg of MoS<sub>2</sub> was dispersed in 2 mL of ethanol containing 0.15 wt.% of Nafion under sonication for 1 h. 40 μL of the catalyst ink (2 mg mL<sup>-1</sup>) was loaded onto the RDE (0.196 cm<sup>2</sup>) serving as the working electrode. A carbon rod and an Ag/AgCl (4 M KCl) electrode were used as the counter electrode and the reference electrode, respectively. All potentials were referenced to the reversible hydrogen electrode (RHE) using the following equation: E(RHE) = E(Ag/AgCl) + 0.205 + 0.059 × pH. All the electrolytes were purged with N<sub>2</sub> for 30 min before measurements to remove dissolved O<sub>2</sub>. The linear sweep voltammetry (LSV) curves were collected with a scan rate of 5 mV s<sup>-1</sup>. Electrochemical impedance spectroscopy (EIS) was measured in the frequency range from 0.1 Hz to 100 kHz with an amplitude of 5 mV. The double-layer capacitance (C<sub>dl</sub>) and roughness factor (R<sub>f</sub>) of various samples were evaluated from the capacitance of the double-layer at the electrode-electrolyte interface using cyclic voltammetry (CV) in a small potential range of 0.15–0.25 V vs. RHE. IR compensation of

polarization curves was performed using the solution resistance ( $R_s$ ) estimated from EIS measurements. The long-term stability test was carried out by chronoamperometric measurement and repetitive CV scans in a potential window from 0 to  $-0.35$  V vs. RHE (refer to IR-uncompensated values). The evolved  $H_2$  was analyzed using gas chromatograph (GC, Clarus 480, PerkinElmer, USA with Ar as a carrier gas and  $5 \text{ \AA}$  molecular sieve column).

## 2. Supplementary Figures

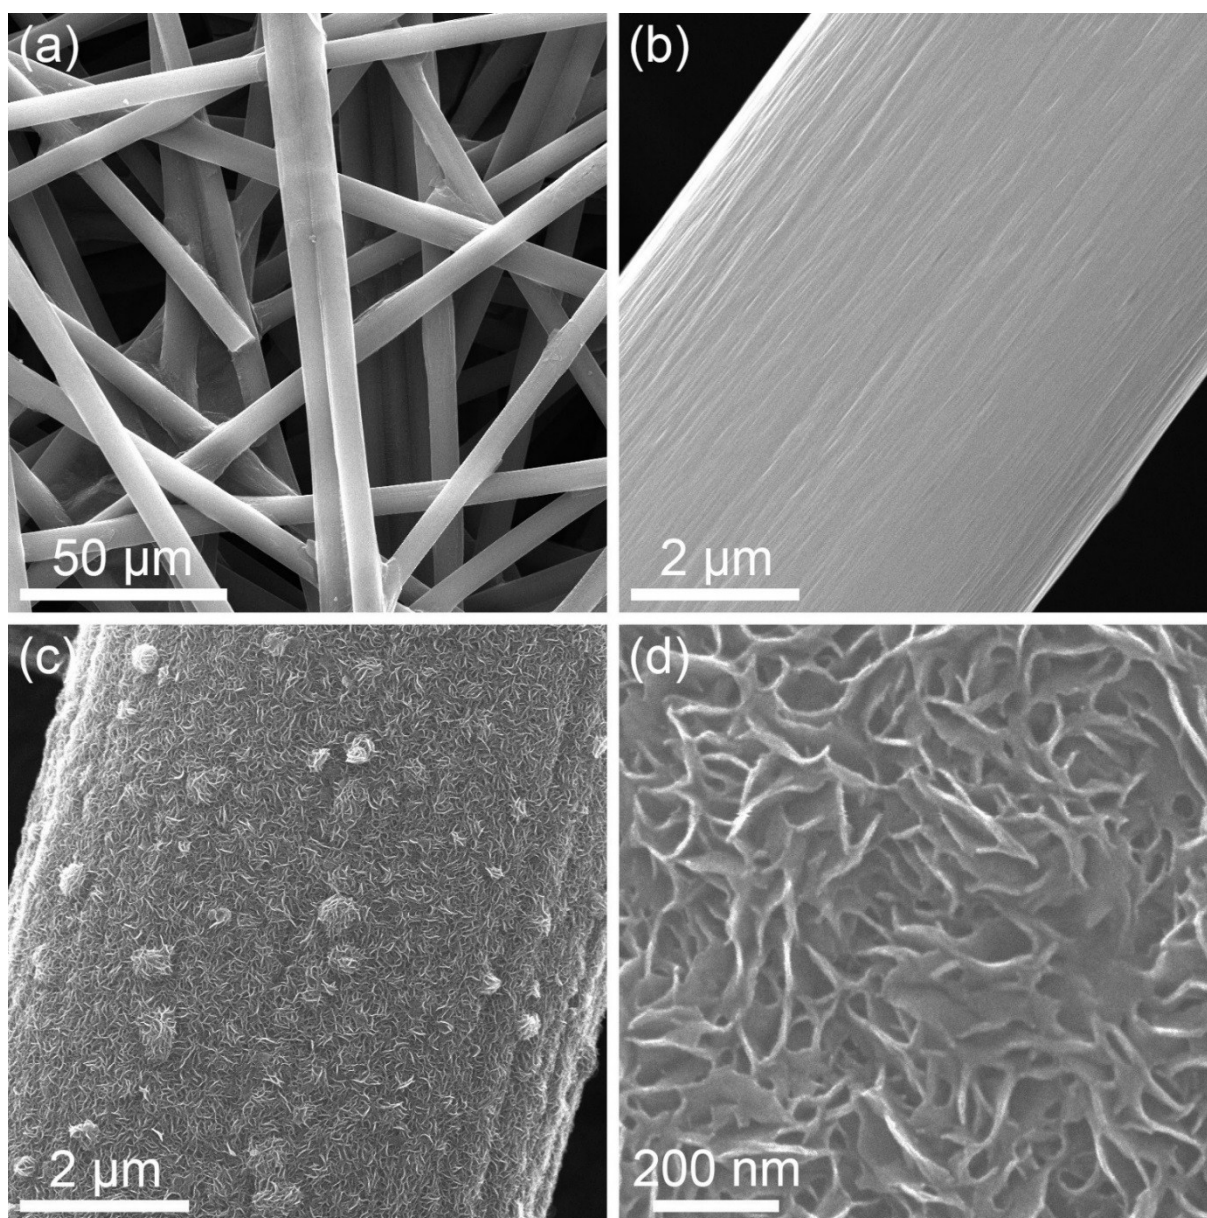

**Fig. S1** (a,b) SEM images of pre-cleaned carbon paper (CP) with clean surface. (c,d) SEM images of  $MoS_2/CP$ , showing the full and homogeneous coverage of CP by vertically aligned  $MoS_2$  nanosheets.



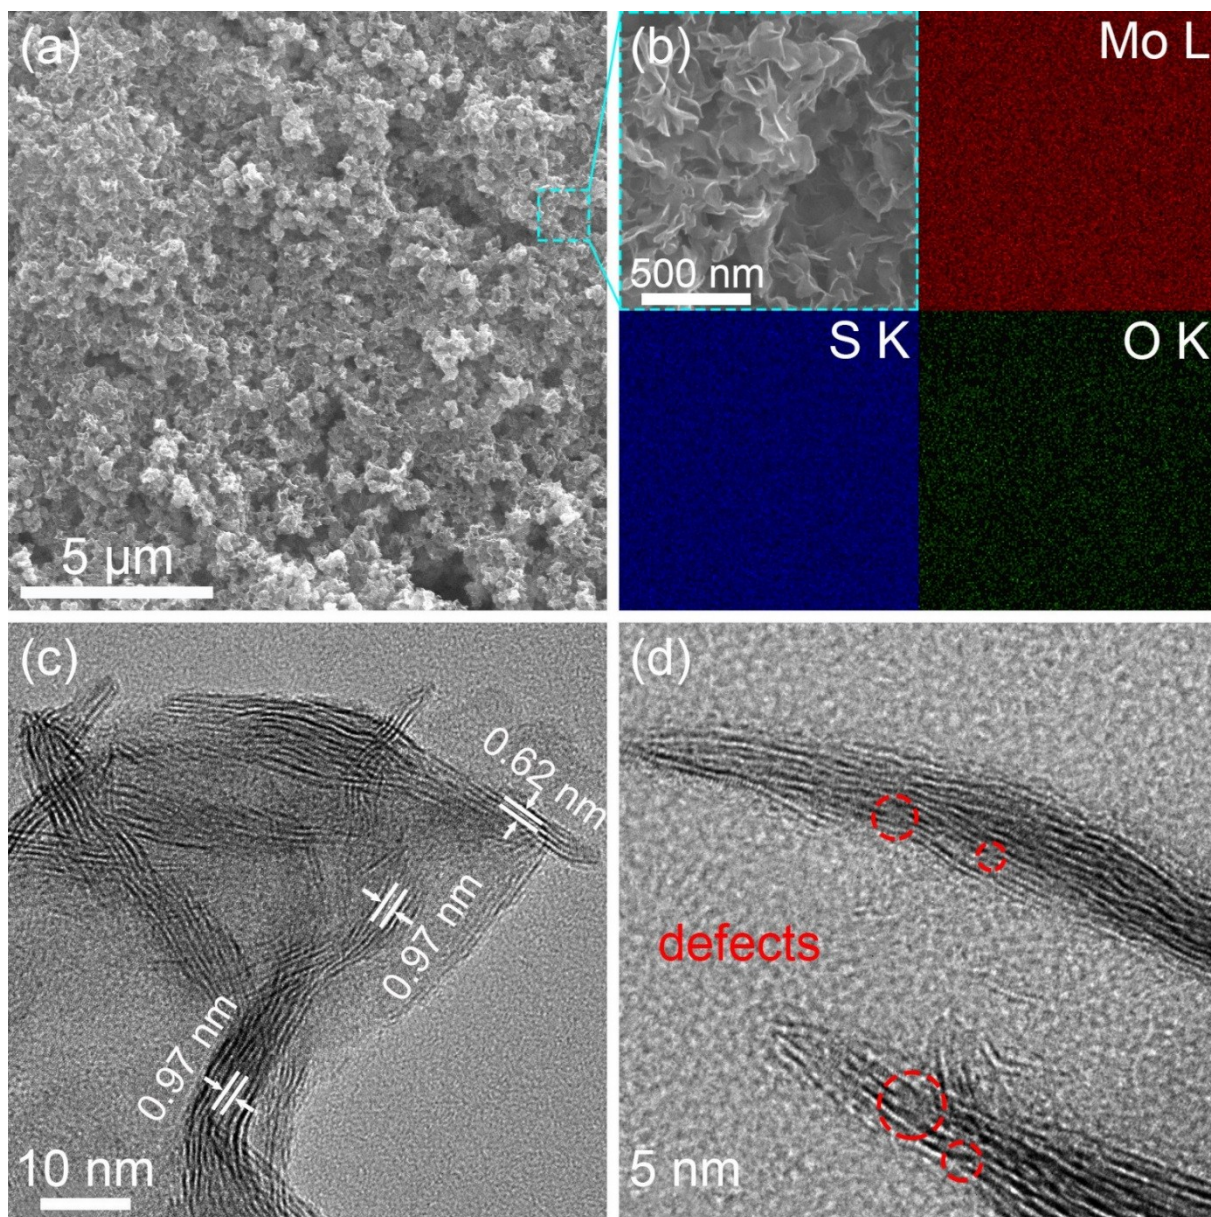

**Fig. S2** (a) SEM image of MoS<sub>2</sub>. (b) Magnified SEM image and corresponding element mapping of MoS<sub>2</sub> for the selected area. (c) HRTEM image of few-layer MoS<sub>2</sub> nanosheets. The well-defined interplanar distance of 0.62 nm corresponds to (002) planes of hexagonal MoS<sub>2</sub>, while the large distance of 0.97 nm indicates the appearance of enlarged interlayers, which agrees with previous reports.<sup>1</sup> (d) Cross-sectional HRTEM image of MoS<sub>2</sub> nanosheets. Selected areas, indicated by red dashed circles, show the presence of defects in the MoS<sub>2</sub> nanosheets.



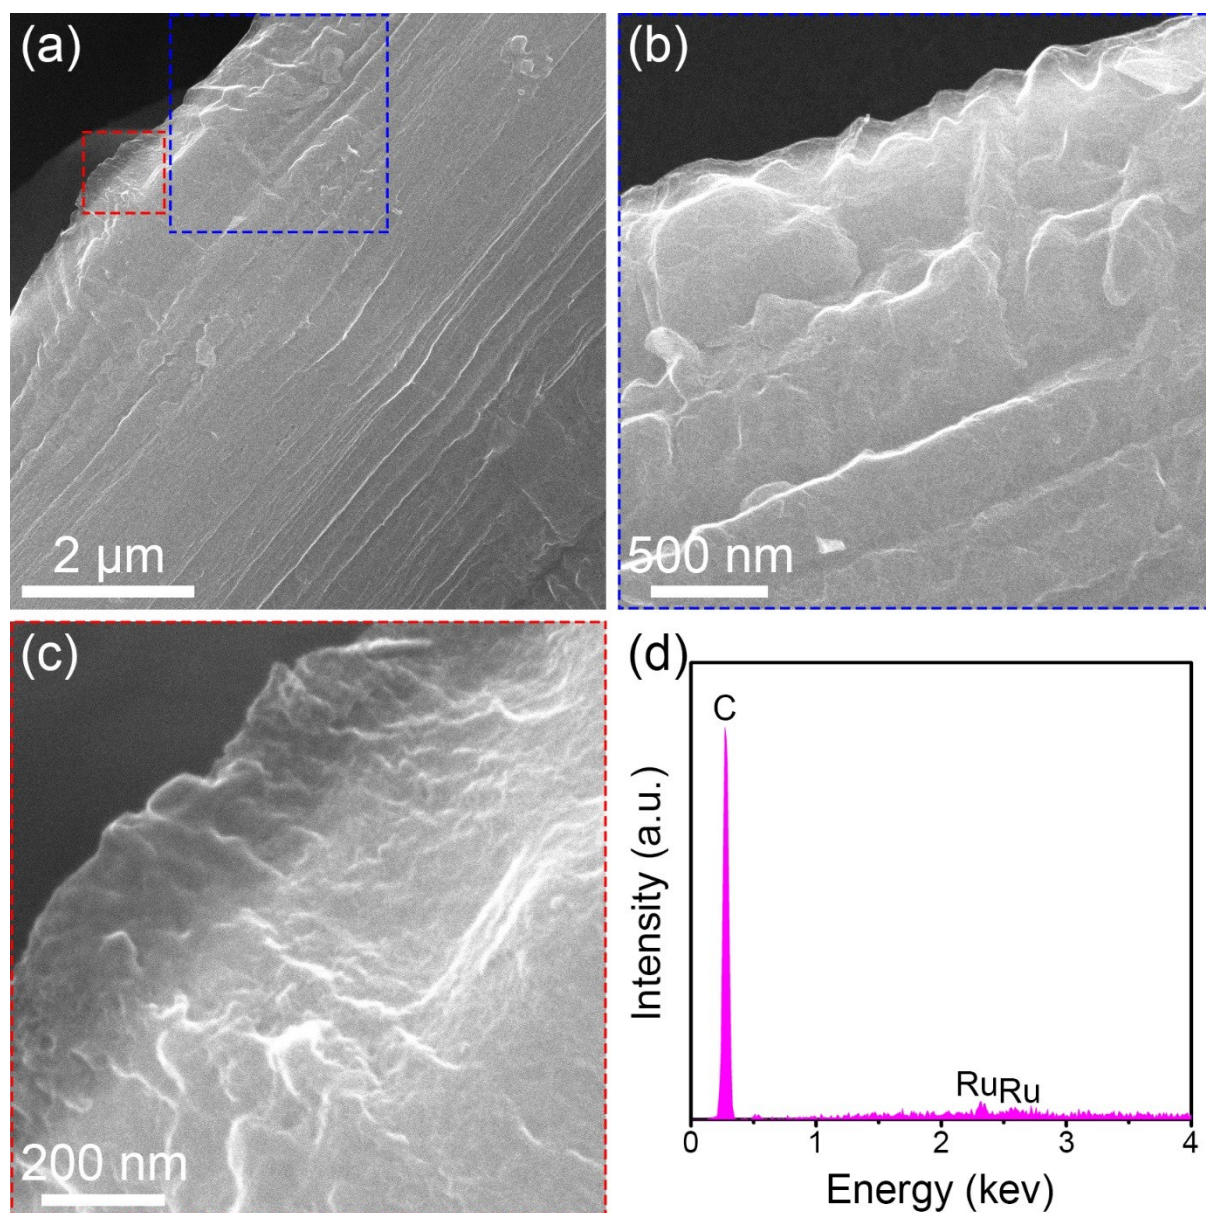

**Fig. S3** (a) SEM image of Ru/CP. (b,c) Magnified SEM images of Ru/CP for selected areas, showing the wrinkled Ru on CP. (d) EDS spectrum of Ru/CP containing C and Ru.

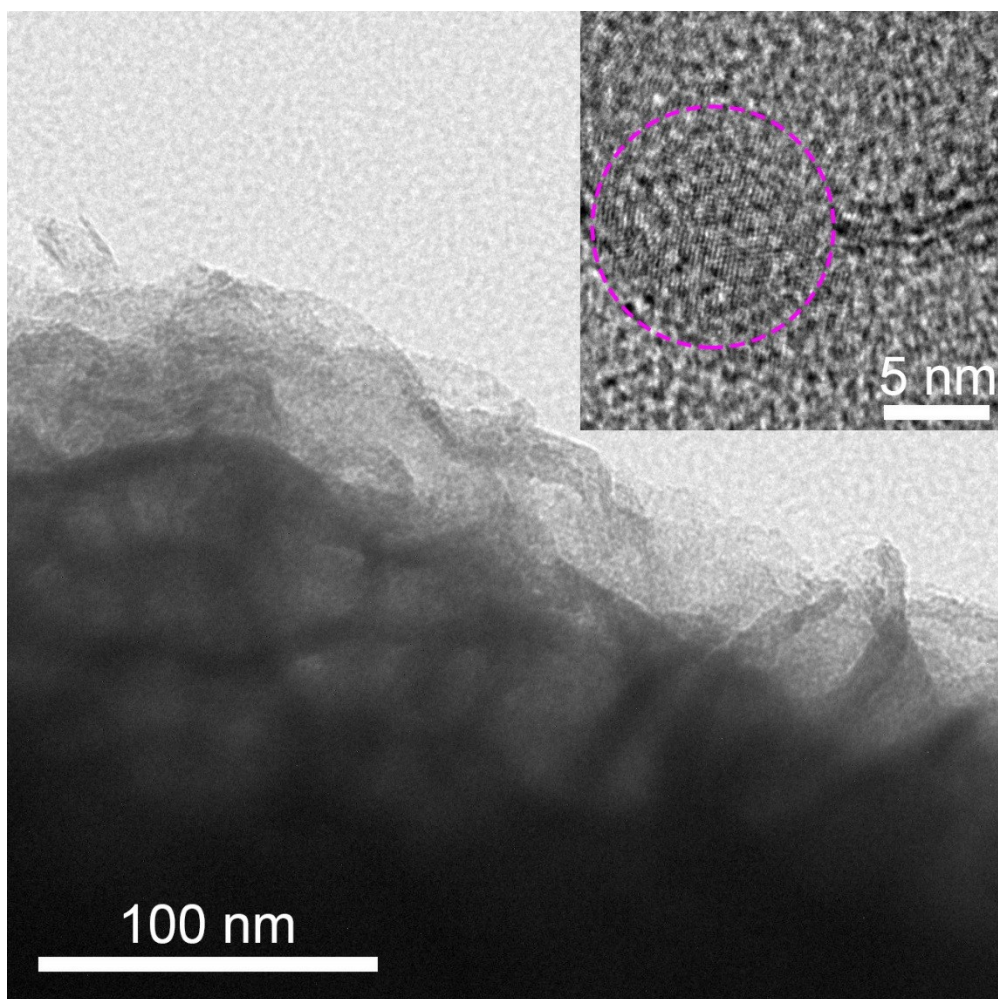

**Fig. S4** TEM image of Ru/MoS<sub>2</sub>. Inset HRTEM image shows an individual Ru nanoparticle of about 10 nm in size.

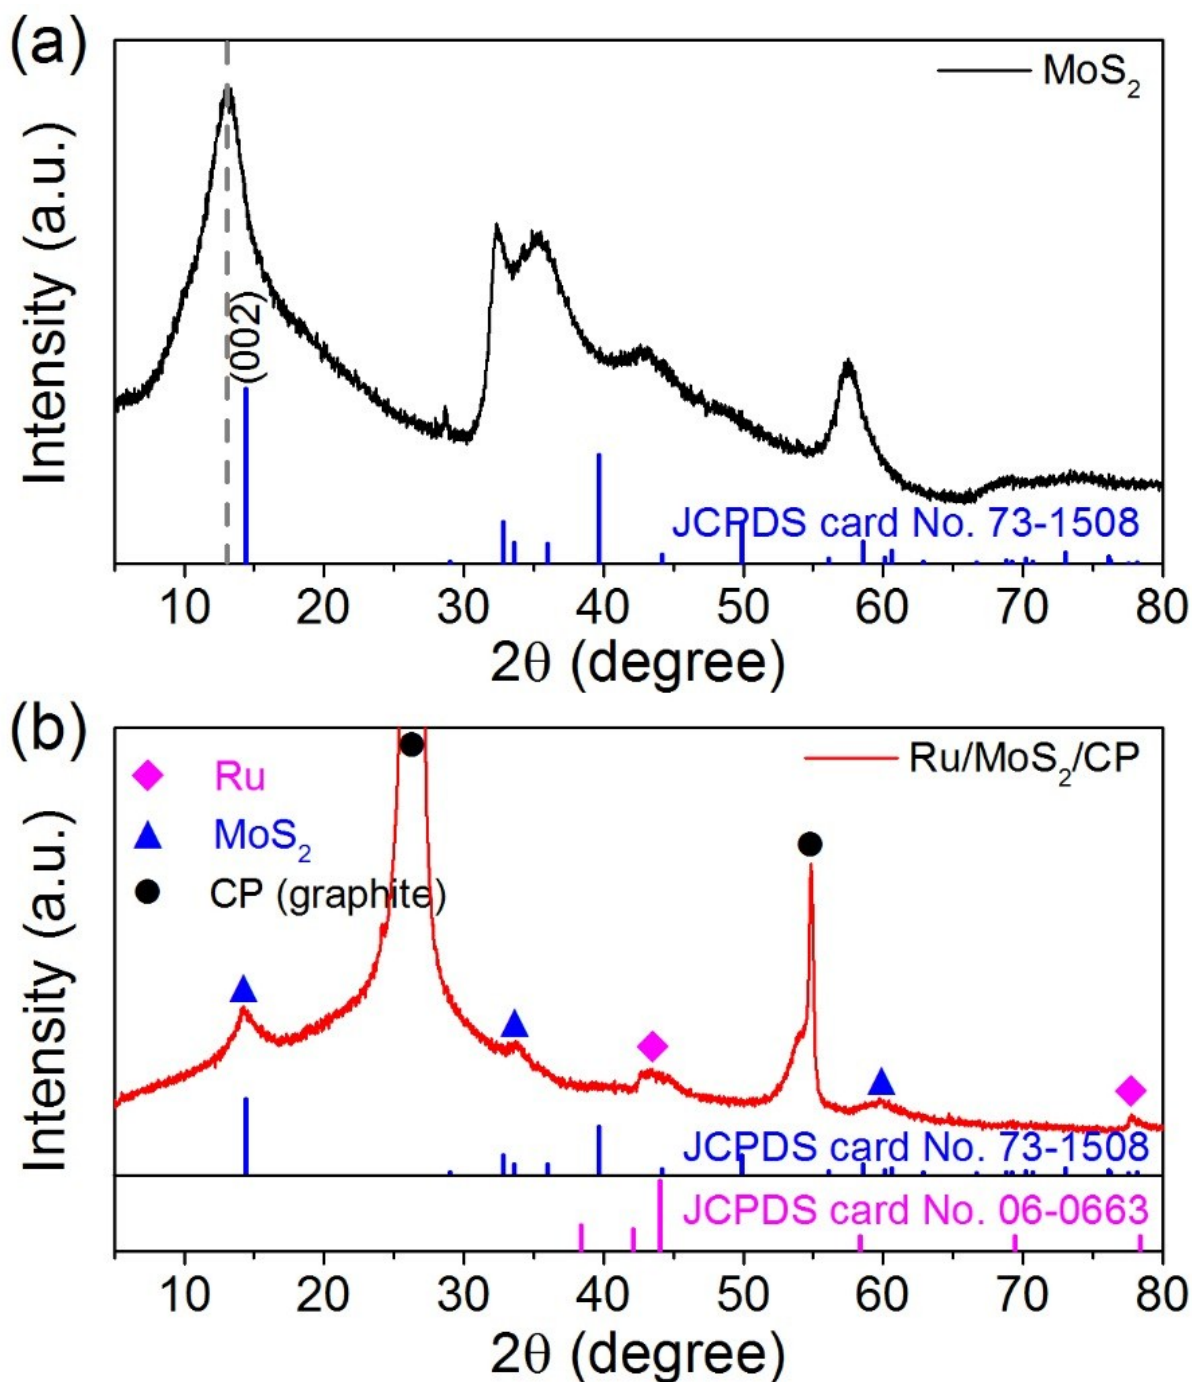

**Fig. S5** XRD patterns of (a) bare  $\text{MoS}_2$  and (b)  $\text{Ru/MoS}_2/\text{CP}$ . The standard patterns of the hexagonal  $\text{MoS}_2$  (JCPDS card No. 73-1508) and the hexagonal Ru (JCPDS card No. 06-0663) are given as references. In the XRD pattern of bare  $\text{MoS}_2$ , the shift of the (002) peak to a lower angle indicates the expansion of partial interlayers, matching well with HRTEM observation (Fig. S2c). According to Xie et al.'s report, thermal treatment ( $> 232^\circ\text{C}$ ) could lead to a structural conversion to the thermodynamically stable  $2\text{H-MoS}_2$ .<sup>1</sup> For this reason, the XRD pattern of  $\text{Ru/MoS}_2/\text{CP}$  shows no shift of the (002) peak of  $\text{MoS}_2$ , which can be further confirmed by its HRTEM result without enlarged interlayers (Fig. 1d).



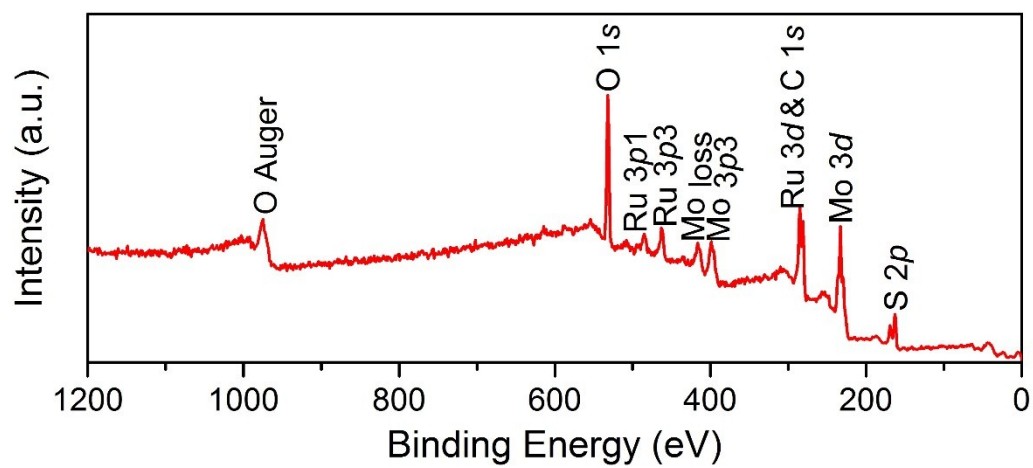

**Fig. S6** XPS survey spectrum of Ru/MoS<sub>2</sub>/CP.

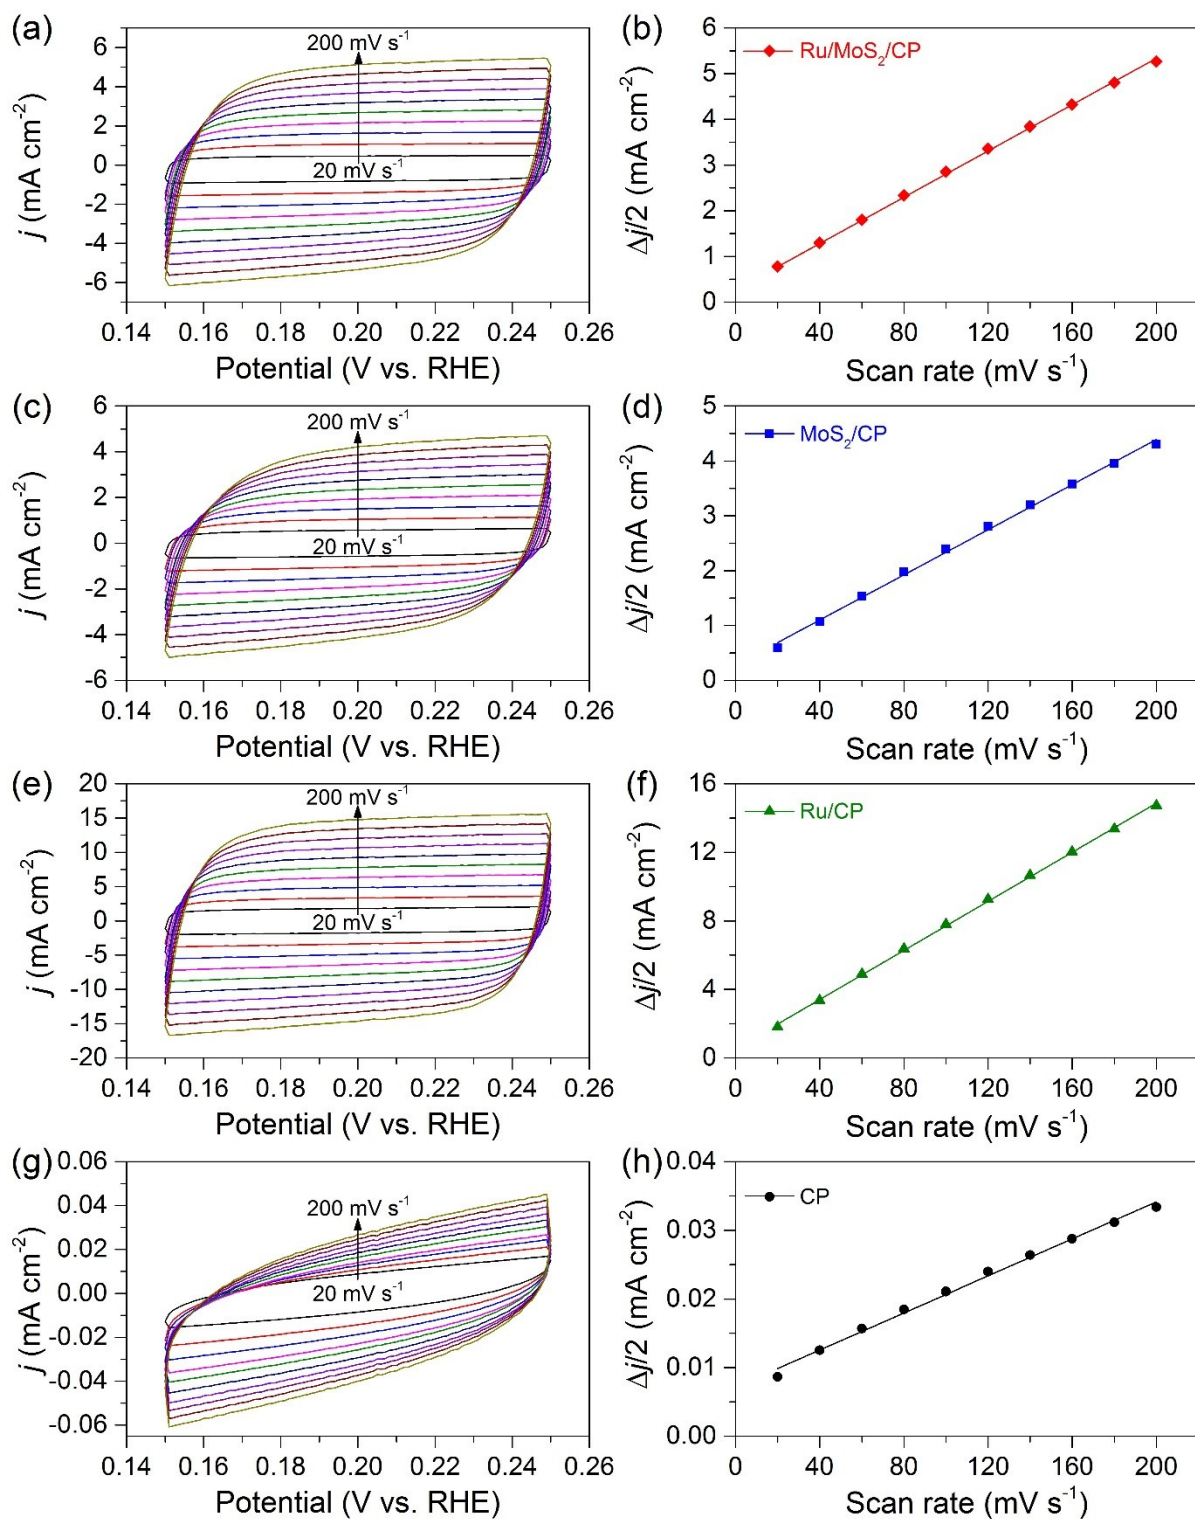

**Fig. S7** CV curves and corresponding capacitive current densities at +0.20 V vs. RHE against scan rate for Ru/MoS<sub>2</sub>/CP (a,b), MoS<sub>2</sub>/CP (c,d), Ru/CP (e,f) and CP (g,h).

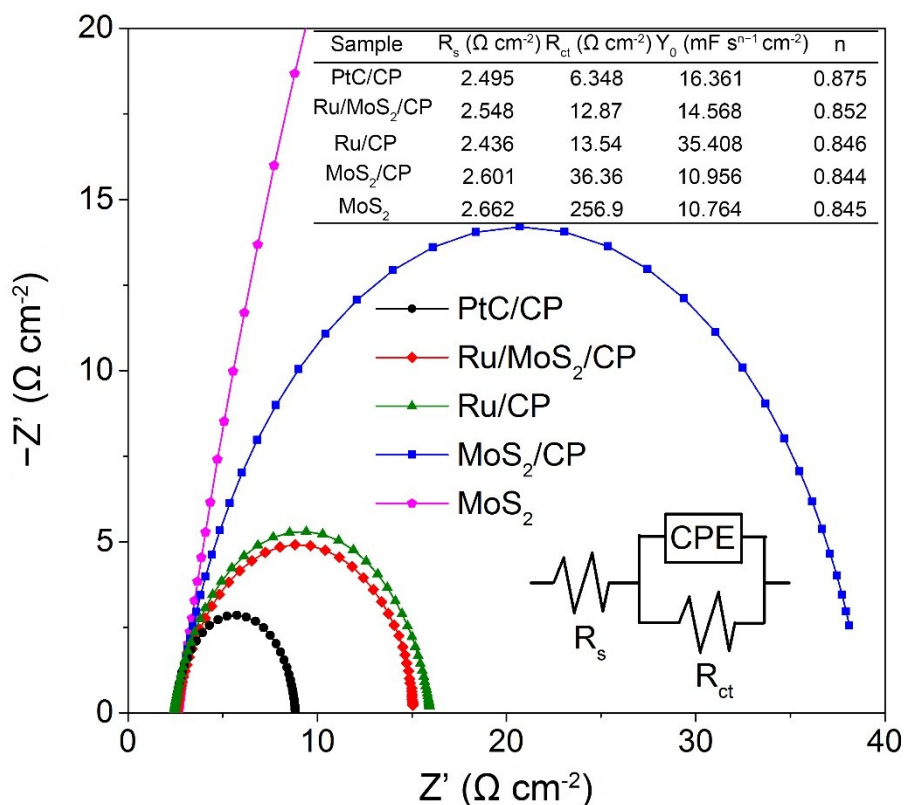

**Fig. S8** Nyquist plots for Ru/MoS<sub>2</sub>/CP, PtC/CP, Ru/CP, MoS<sub>2</sub>/CP, and MoS<sub>2</sub> electrodes, measured at  $-0.05$  V vs. RHE in  $1.0$  M KOH. Insets are the equivalent circuit and simulated parameters, where  $R_s$ ,  $R_{ct}$ ,  $Y_0$  and  $n$  are the solution resistance, charge-transfer resistance, and the parameters of a constant phase element (CPE), respectively. The solid lines present the fitted curves.

It was found that bare MoS<sub>2</sub> possesses the highest charge transfer resistance ( $R_{ct}$ , up to  $256.9 \Omega \text{ cm}^{-2}$ ), as the resistivity through the basal planes is approximately 2200 times higher than along the planes for MoS<sub>2</sub> nanosheets.<sup>2</sup> For MoS<sub>2</sub>/CP, the  $R_{ct}$  decreases significantly due to the fast electron transfer along CP and the intimate contact between CP and vertically aligned MoS<sub>2</sub> nanosheets. This result is consistent with previous studies.<sup>3,4</sup> Interestingly, Ru/CP displays the smallest  $R_s$ , which is likely attributed to the metallic character of Ru and its direct contact with CP. It is clear that Ru/MoS<sub>2</sub>/CP exhibits a small  $R_{ct}$  of  $12.87 \Omega \text{ cm}^{-2}$ , indicating favourable electrode kinetics for alkaline HER. In addition to the conductive CP framework, the Ru-decoration and O-incorporation ensure better conductivity along and through the planes of the MoS<sub>2</sub> nanosheets.

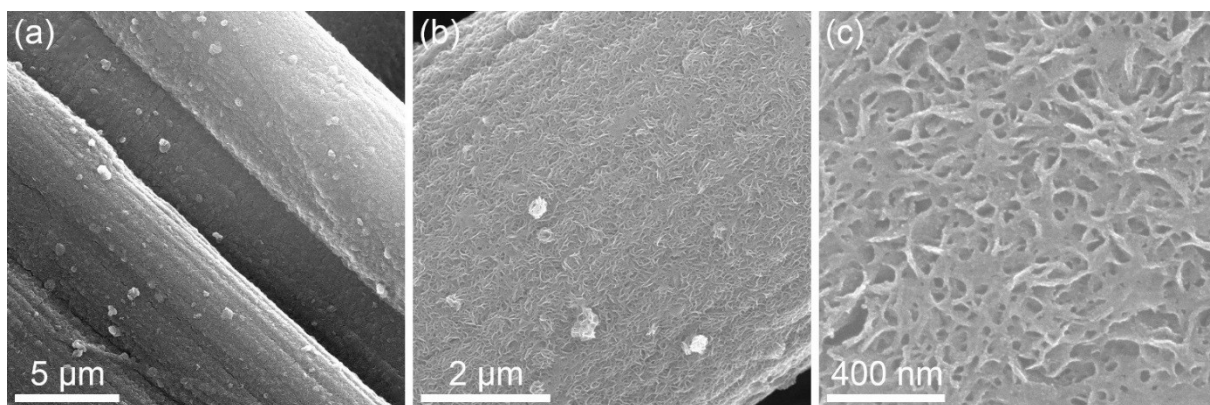

**Fig. S9** (a–c) SEM images of Ru/MoS<sub>2</sub>/CP electrode after long-term operation.



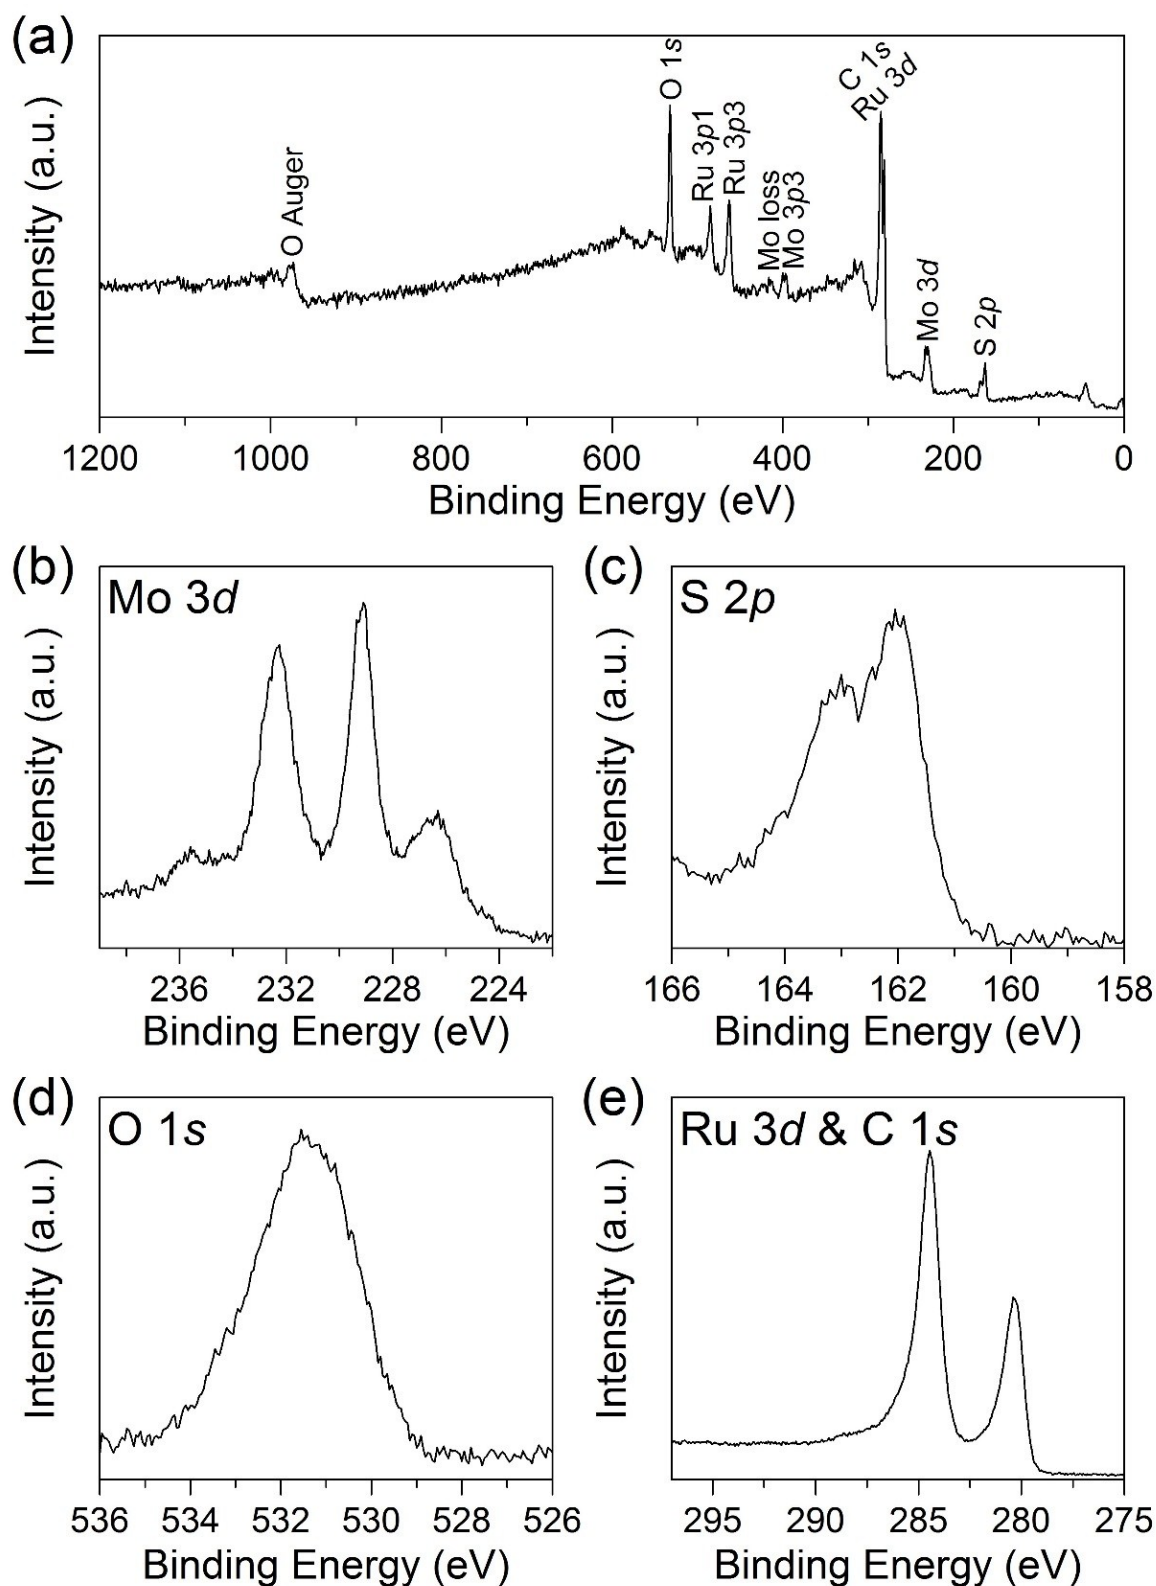

**Fig. S10** (a) XPS survey spectrum and high-resolution XPS spectra of (b) Mo 3d, (c) S 2p, (d) O 1s, and (e) Ru 3d & C 1s of Ru/MoS<sub>2</sub>/CP electrode after long-term operation.

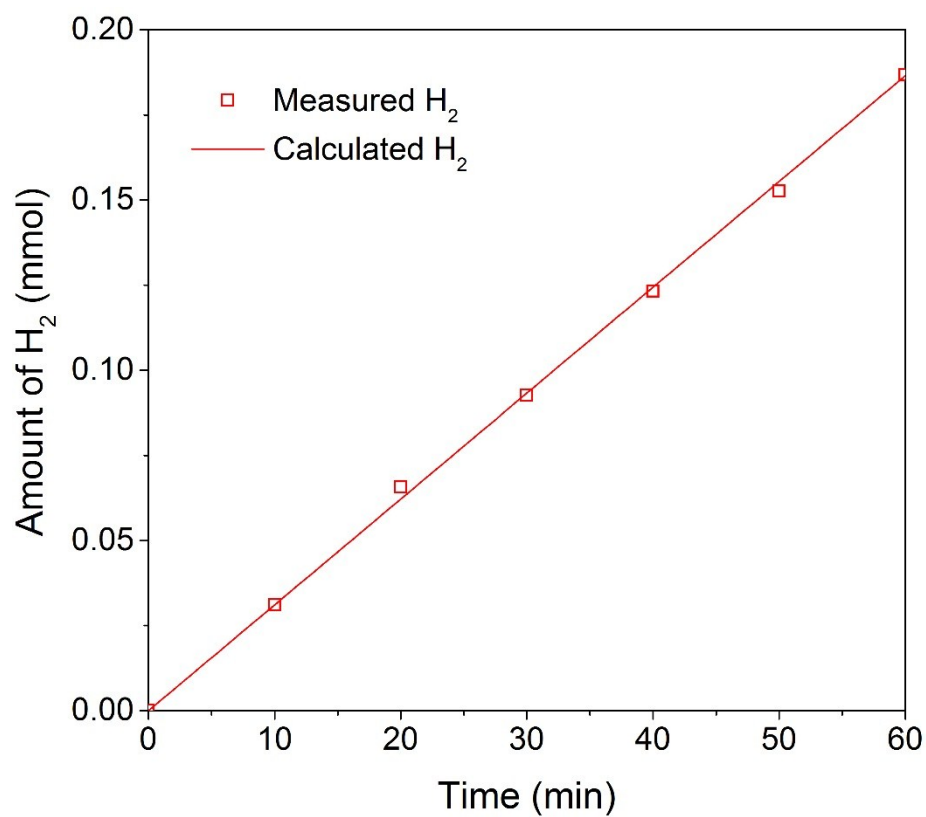

**Fig. S11** The amount of H<sub>2</sub> experimentally measured and theoretically calculated versus time for alkaline HER of Ru/MoS<sub>2</sub>/CP at a current density of  $-10 \text{ mA cm}^{-2}$ .

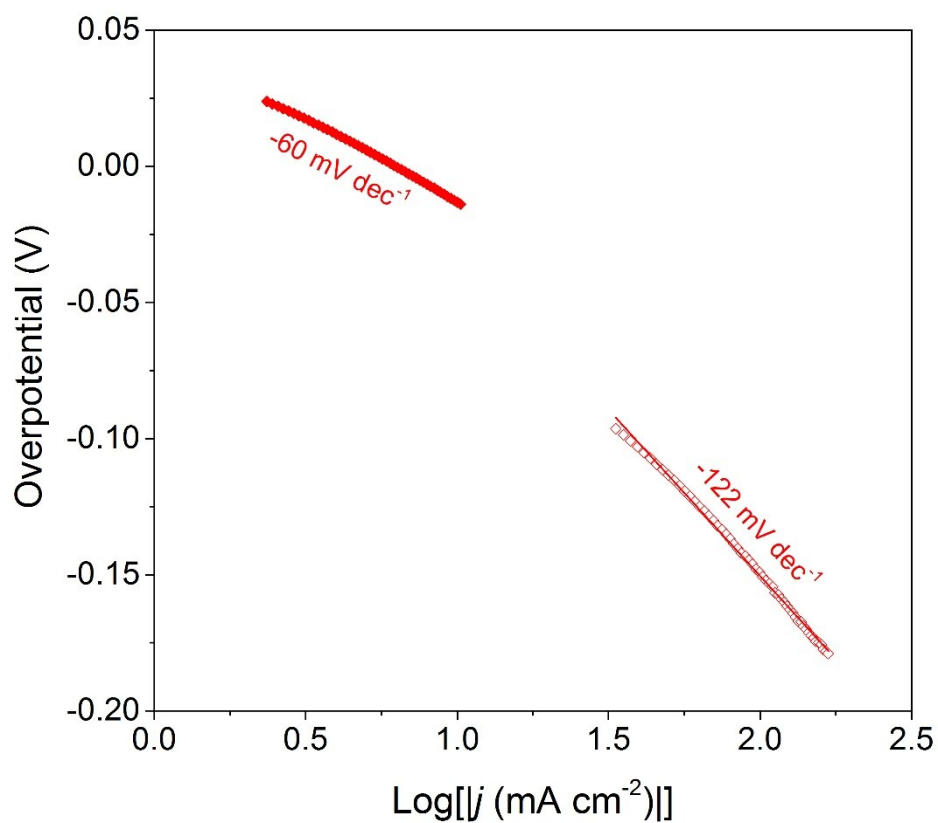

**Fig. S12** Tafel plots of Ru/MoS<sub>2</sub>/CP at low (solid squares) and high (open squares) potentials.

### 3. Supplementary Tables

**Table S1.** Comparison of Ru-based electrocatalysts for HER.

| Catalyst                            | Electrode     | Electrolyte                          | $\eta_{\text{onset}}$ (mV) | $\eta_{10}$ (mV)              | Tafel slope (mV dec <sup>-1</sup> ) | Ref.      | Year |
|-------------------------------------|---------------|--------------------------------------|----------------------------|-------------------------------|-------------------------------------|-----------|------|
| Ru/MoS <sub>2</sub>                 | Carbon paper  | 1 M KOH                              | 0                          | -13                           | -60                                 | This work |      |
| Ru@C <sub>2</sub> N                 | Glassy carbon | 1 M KOH                              | -                          | -17                           | -38                                 | 5         | 2017 |
| Ru-MoO <sub>2</sub>                 | Glassy carbon | 1 M KOH                              | -                          | -29                           | -31                                 | 6         | 2017 |
| Co-Ru-Pt                            | Carbon paste  | 0.5 M H <sub>2</sub> SO <sub>4</sub> | -                          | -73.1 @ 4 mA cm <sup>-2</sup> | -30.4                               | 7         | 2017 |
| Ru/C <sub>3</sub> N <sub>4</sub> /C | Glassy carbon | 1 M KOH                              | -                          | -79                           | -                                   | 8         | 2016 |
| Ru/GLC                              | Glassy carbon | 0.5 M H <sub>2</sub> SO <sub>4</sub> | -3                         | -35                           | -46                                 | 9         | 2016 |
| Ru/SiNW-42.9                        | Glassy carbon | 0.5 M H <sub>2</sub> SO <sub>4</sub> | -                          | -200                          | -81                                 | 10        | 2015 |
| GCE-S-GNs-1000-CB-Ru                | Glassy carbon | 0.5 M H <sub>2</sub> SO <sub>4</sub> | 0 <sup>[a]</sup>           | -75 <sup>[a]</sup>            | -61                                 | 11        | 2015 |

<sup>[a]</sup> Values estimated from polarization curve found in corresponding Ref.

**Table S2.** Comparison of MoS<sub>2</sub>-based electrocatalysts for HER.

| Catalyst                                                                   | Electrode         | Electrolyte                                     | $\eta_{\text{onset}}$ (mV) | $\eta_{10}$ (mV)    | Tafel slope (mV dec <sup>-1</sup> ) | Ref.      | Year |
|----------------------------------------------------------------------------|-------------------|-------------------------------------------------|----------------------------|---------------------|-------------------------------------|-----------|------|
| Ru/MoS <sub>2</sub>                                                        | Carbon paper      | 1 M KOH                                         | 0                          | -13                 | -59.7                               | This work |      |
| MoS <sub>2</sub> -Ni <sub>3</sub> S <sub>2</sub> HNRs/NF                   | Nickel foam       | 1 M KOH                                         | -31                        | -98                 | -61                                 | 12        | 2017 |
| MoS <sub>2</sub>  NiS MoO <sub>3</sub>                                     | Ti sheet          | 1 M KOH                                         | -36                        | -91                 | -54.5                               | 13        | 2017 |
| (MoS <sub>2</sub> ) <sub>0.6</sub> (SnO <sub>2</sub> ) <sub>0.4</sub> /rGO | Glassy carbon     | 0.5 M H <sub>2</sub> SO <sub>4</sub>            | -                          | -263±5              | -50.8                               | 14        | 2017 |
| O-MoS <sub>2</sub>                                                         | Carbon cloth      | 0.5 M H <sub>2</sub> SO <sub>4</sub>            | -                          | -258                | -57                                 | 15        | 2017 |
| MoS <sub>2</sub> (1-x)Se <sub>2x</sub> (HD)/CNTs                           | Carbon nanofibers | 0.5 M H <sub>2</sub> SO <sub>4</sub>            | -54                        | -150                | -144                                | 16        | 2017 |
| Co <sub>2</sub> Mo <sub>9</sub> S <sub>26</sub>                            | FTO               | 0.5 M H <sub>2</sub> SO <sub>4</sub>            | -                          | -260                | -64                                 | 17        | 2017 |
| 1T/2H MoS <sub>2</sub>                                                     | Glassy carbon     | 0.5 M H <sub>2</sub> SO <sub>4</sub>            | -                          | -234                | -46                                 | 18        | 2017 |
| Coral MoS <sub>2</sub> @GQDs                                               | Glassy carbon     | 0.5 M H <sub>2</sub> SO <sub>4</sub>            | -95                        | -120                | -40                                 | 19        | 2017 |
| MoS <sub>2</sub> QDs@GS 3:1                                                | Glassy carbon     | 0.5 M H <sub>2</sub> SO <sub>4</sub>            | -94                        | -140                | -68                                 | 20        | 2017 |
| C-1TMoS <sub>2</sub>                                                       | Glassy carbon     | 0.5 M H <sub>2</sub> SO <sub>4</sub>            | -113                       | -156                | -42.7                               | 21        | 2017 |
| MoS <sub>2</sub> @CNTs-5                                                   | Glassy carbon     | 0.5 M H <sub>2</sub> SO <sub>4</sub>            | -                          | -62                 | -49                                 | 4         | 2017 |
| MoS <sub>2</sub> /Ni <sub>3</sub> S <sub>2</sub>                           | Nickel foam       | 1 M KOH                                         | -50                        | -110                | -83.1                               | 22        | 2016 |
| NiS <sub>2</sub> -MoS <sub>2</sub>                                         | Ti foil           | 1 M KOH                                         | -76                        | -                   | -70                                 | 23        | 2016 |
| MoS <sub>2</sub> @Ni/CC                                                    | Carbon cloth      | 1 M KOH                                         | -30                        | -91                 | -89                                 | 24        | 2016 |
| HF-MoSP                                                                    | Glassy carbon     | 0.5 M H <sub>2</sub> SO <sub>4</sub><br>1 M KOH | -29<br>-42                 | -108<br>-119        | -76<br>-85                          | 25        | 2016 |
| Pt/MoS <sub>2</sub> /CC                                                    | Carbon cloth      | 0.5 M H <sub>2</sub> SO <sub>4</sub>            | 0                          | -18                 | -49                                 | 26        | 2016 |
| Pt/MoS <sub>2</sub>                                                        | Mo foil           | 0.5 M H <sub>2</sub> SO <sub>4</sub>            | -                          | -60 <sup>[a]</sup>  | -                                   | 27        | 2016 |
| N-MoS <sub>2</sub> -3                                                      | Glassy carbon     | 0.5 M H <sub>2</sub> SO <sub>4</sub>            | -37                        | -46                 | -47                                 | 28        | 2016 |
| Se-GL-MoS <sub>2</sub> /G                                                  | Glassy carbon     | 0.5 M H <sub>2</sub> SO <sub>4</sub>            | -102                       | -185 <sup>[a]</sup> | -50                                 | 29        | 2016 |
| Sn-FL-MoS <sub>2</sub> /G                                                  | Glassy carbon     | 0.5 M H <sub>2</sub> SO <sub>4</sub>            | -134                       | -250 <sup>[a]</sup> | -54                                 | 30        | 2016 |
| Co-MoS <sub>2</sub> /G-3                                                   | Glassy carbon     | 0.5 M H <sub>2</sub> SO <sub>4</sub>            | -142                       | -194                | -44.3                               | 31        | 2016 |
| Cu <sub>7</sub> S <sub>4</sub> @MoS <sub>2</sub>                           | Glassy carbon     | 0.5 M H <sub>2</sub> SO <sub>4</sub>            | -                          | -133                | -48                                 | 32        | 2016 |
| CoS <sub>2</sub> -MoS <sub>2</sub> /CNTs                                   | Glassy carbon     | 0.5 M H <sub>2</sub> SO <sub>4</sub>            | -70                        | -180 <sup>[a]</sup> | -67                                 | 33        | 2016 |
| Ni <sub>2</sub> P/MoS <sub>2</sub>                                         | Glassy carbon     | 0.5 M H <sub>2</sub> SO <sub>4</sub>            | -75                        | -190 <sup>[a]</sup> | -76                                 | 34        | 2016 |
| MoS <sub>2</sub> -W3                                                       | Glassy carbon     | 0.5 M H <sub>2</sub> SO <sub>4</sub>            | -200                       | -260                | -45.1                               | 35        | 2016 |
| Co-FL-MoS <sub>2</sub> /NG                                                 | Glassy carbon     | 0.5 M H <sub>2</sub> SO <sub>4</sub>            | -90                        | -175 <sup>[a]</sup> | -59                                 | 36        | 2016 |
| MoSSe@rGO                                                                  | Glassy carbon     | 0.5 M H <sub>2</sub> SO <sub>4</sub>            | -                          | -153                | -51                                 | 37        | 2016 |
| Ni-MoS <sub>2</sub>                                                        | Glassy carbon     | 0.5 M H <sub>2</sub> SO <sub>4</sub>            | -200                       | -305 <sup>[a]</sup> | -47                                 | 38        | 2016 |
| P-1T-MoS <sub>2</sub>                                                      | Glassy carbon     | 0.5 M H <sub>2</sub> SO <sub>4</sub>            | -                          | -153                | -43                                 | 39        | 2016 |
| O-MoS <sub>2</sub> /rGO                                                    | Glassy carbon     | 0.5 M H <sub>2</sub> SO <sub>4</sub>            | -100                       | -                   | -40                                 | 40        | 2016 |
| MoS <sub>2</sub> /N-RGO-180                                                | Glassy carbon     | 0.5 M H <sub>2</sub> SO <sub>4</sub>            | -5                         | -56                 | -41.3                               | 41        | 2016 |
| CoMoS <sub>3</sub>                                                         | Glassy carbon     | 0.5 M H <sub>2</sub> SO <sub>4</sub>            | -112                       | -171                | -56.9                               | 42        | 2016 |
| CoMoS <sub>2</sub> -2-C                                                    | Glassy carbon     | 0.5 M H <sub>2</sub> SO <sub>4</sub>            | -90                        | -135                | -50                                 | 43        | 2015 |
| MoS <sub>2</sub> /CoSe <sub>2</sub>                                        | Glassy carbon     | 0.5 M H <sub>2</sub> SO <sub>4</sub>            | -11                        | -68                 | -36                                 | 44        | 2015 |



|                                                        |               |                                      |      |                     |       |    |      |
|--------------------------------------------------------|---------------|--------------------------------------|------|---------------------|-------|----|------|
| MoS <sub>2</sub> composite (NMP)                       | Glassy carbon | 0.5 M H <sub>2</sub> SO <sub>4</sub> | −120 | −250 <sup>[a]</sup> | −69   | 45 | 2015 |
| H-MoS <sub>2</sub>                                     | Glassy carbon | 0.5 M H <sub>2</sub> SO <sub>4</sub> | −50  | −167                | −70   | 46 | 2015 |
| Co <sub>9</sub> S <sub>8</sub> @MoS <sub>2</sub> /CNFs | Glassy carbon | 0.5 M H <sub>2</sub> SO <sub>4</sub> | −64  | −190                | −110  | 47 | 2015 |
| [Mo <sub>2</sub> S <sub>12</sub> ] <sup>2−</sup>       | Glassy carbon | 0.5 M H <sub>2</sub> SO <sub>4</sub> | -    | −161                | −39   | 48 | 2015 |
| Se-doped MoS <sub>2</sub>                              | Glassy carbon | 0.5 M H <sub>2</sub> SO <sub>4</sub> | −140 | −280 <sup>[a]</sup> | −55   | 49 | 2015 |
| IF-Re <sub>x</sub> Mo <sub>1−x</sub> S <sub>2</sub>    | Glassy carbon | 0.5 M H <sub>2</sub> SO <sub>4</sub> | −70  | −250                | −136  | 50 | 2015 |
| Pt-MoS <sub>2</sub>                                    | Glassy carbon | 0.1 M H <sub>2</sub> SO <sub>4</sub> | -    | −140 <sup>[a]</sup> | −96   | 51 | 2015 |
| CoS <sub>2</sub> @MoS <sub>2</sub>                     | Ti foil       | 0.5 M H <sub>2</sub> SO <sub>4</sub> | −44  | −110.5              | −57.3 | 52 | 2015 |
| ET&IE MoS <sub>2</sub>                                 | Glassy carbon | 0.5 M H <sub>2</sub> SO <sub>4</sub> | −103 | −149                | −49   | 53 | 2015 |
| NG-Mo                                                  | Graphene film | 0.1 M H <sub>2</sub> SO <sub>4</sub> | -    | −140.6              | −105  | 54 | 2015 |
| MoS <sub>2</sub> QDs                                   | Glassy carbon | 0.5 M H <sub>2</sub> SO <sub>4</sub> | −210 | −300 <sup>[a]</sup> | −60   | 55 | 2015 |
| MWCNTs@Cu@MoS <sub>2</sub>                             | Glassy carbon | 0.5 M H <sub>2</sub> SO <sub>4</sub> | −146 | −184                | −62   | 56 | 2015 |
| MoS <sub>x</sub> -NCNT                                 | Glassy carbon | 0.5 M H <sub>2</sub> SO <sub>4</sub> | −75  | −110                | −40   | 57 | 2014 |
| MoP S                                                  | Ti foil       | 0.5 M H <sub>2</sub> SO <sub>4</sub> | -    | −64                 | −50   | 58 | 2014 |
| MoS <sub>2</sub> film                                  | Ti foil       | 0.5 M H <sub>2</sub> SO <sub>4</sub> | −150 | -                   | −51   | 59 | 2014 |
| 1 L MoS <sub>2</sub> @NPG                              | Nanoporous Au | 0.5 M H <sub>2</sub> SO <sub>4</sub> | −118 | −226                | −46   | 60 | 2014 |
| O-MoS <sub>2</sub> (S 180)                             | Glassy carbon | 0.5 M H <sub>2</sub> SO <sub>4</sub> | −120 | −180 <sup>[a]</sup> | −55   | 1  | 2013 |
| 1T-MoS <sub>2</sub>                                    | Glassy carbon | 0.5 M H <sub>2</sub> SO <sub>4</sub> | -    | −187                | −43   | 61 | 2013 |
| MoS <sub>2</sub> /RGO                                  | Glassy carbon | 0.5 M H <sub>2</sub> SO <sub>4</sub> | -    | −150 <sup>[a]</sup> | −41   | 62 | 2011 |

<sup>[a]</sup> Values estimated from polarization curves found in corresponding Ref.

## 4. Supplementary Notes

### Supplementary Note 1. Definition of overpotential and Tafel slope

According to classic electrochemistry books,<sup>63,64</sup> the overpotential ( $\eta$ ) is defined as the difference between the actual applied potential ( $E$ ) and the reversible potential ( $E_r$ ) of the reaction:

$$\eta = E - E_r$$

For the HER,  $E_r$  is 0 V vs. RHE. As a result, HER  $\eta$  equals to the actual applied potential  $E$ , which is always a negative quantity. Moreover, according to the Tafel equation ( $\eta = a + b \cdot \log|j|$ ), the HER Tafel slope  $b$  determined from the Tafel plot ( $\eta$  vs.  $\log|j|$ ) should also be negative. Note that presenting the data in this way is consistent with electrochemistry conventions.

Note that much of the literature have not paid attention to the definitions and reported HER  $\eta$  and Tafel slope in absolute values. To practice correct notations, the electrochemistry research community should adopt the strict attitude towards electrochemical quantities.

### Supplementary Note 2. Double-layer capacitance, roughness factor, and intrinsic alkaline HER activity

| Sample                  | $C_{dl}$ (mF cm <sup>-2</sup> ) <sup>[a]</sup> | $R_f$ <sup>[b]</sup> | $j$ @ -0.05 V vs. RHE<br>(mA cm <sup>-2</sup> ) | $j_{specific}$ @ -0.05 V vs. RHE<br>( $\mu$ A cm <sup>-2</sup> ) <sup>[c]</sup> |
|-------------------------|------------------------------------------------|----------------------|-------------------------------------------------|---------------------------------------------------------------------------------|
| Ru/MoS <sub>2</sub> /CP | 25                                             | 416.7                | -31.98                                          | -76.75                                                                          |
| Ru/CP                   | 71.6                                           | 1193.3               | -19.22                                          | -16.11                                                                          |
| MoS <sub>2</sub> /CP    | 20.6                                           | 343.3                | -1.93                                           | -5.62                                                                           |

<sup>[a]</sup>  $C_{dl}$  is estimated by applying the equation:  $C_{dl} = \frac{\Delta j}{2 \cdot v} = \frac{(j_a - j_c)}{2 \cdot v}$ ,<sup>65</sup> where  $j_a$  and  $j_c$  are the anodic and cathodic current density, respectively, recorded at a potential of +0.20 V vs. RHE, and  $v$  is the scan rate (Fig. S7).

<sup>[b]</sup> According to the Ref. 66, an ideal plane electrode has a  $C_{dl}$  of 60  $\mu$ F cm<sup>-2</sup>, and  $R_f$  can be

calculated using the equation:  $R_f = \frac{C_{dl}}{60} \times 1000$ .

<sup>[c]</sup> According to the Ref. 67 and 68,  $j_{specific}$  is calculated by the equation:  $j_{specific} = \frac{j}{R_f}$ , where  $j$  is the HER current density at a potential of -0.05 V vs. RHE.

### Supplementary Note 3. $C_{dl}$ measured by EIS

The parameters (i.e.,  $R_s$ ,  $R_{ct}$ ,  $Y_0$ , and  $n$ ) from the EIS measurement using the applied equivalent circuit can be used to calculate  $C_{dl}$  according to the following equation:<sup>65,68–70</sup>

$$C_{dl} = [Y_0(\frac{1}{R_s} + \frac{1}{R_{ct}})^{(n-1)}]^{-\frac{1}{n}}$$

As shown in the below table, the  $C_{dl}$  values estimated by EIS match well with those obtained from the scan rate-dependent CVs (within an error range of  $\pm 10\%$ ).

| Sample                  | $R_s$ ( $\Omega$ cm <sup>-2</sup> ) | $R_{ct}$ ( $\Omega$ cm <sup>-2</sup> ) | $Y_0$ (mF s <sup>n-1</sup> cm <sup>-2</sup> ) | $n$   | $C_{dl}$ (mF cm <sup>-2</sup> ) |
|-------------------------|-------------------------------------|----------------------------------------|-----------------------------------------------|-------|---------------------------------|
| Ru/MoS <sub>2</sub> /CP | 2.548                               | 12.87                                  | 14.568                                        | 0.852 | 26.45                           |
| Ru/CP                   | 2.436                               | 13.54                                  | 35.408                                        | 0.846 | 77.34                           |
| MoS <sub>2</sub> /CP    | 2.601                               | 36.36                                  | 10.956                                        | 0.844 | 20.09                           |

#### Supplementary Note 4. HER mechanism and Tafel slope

Regarding the HER mechanism, two possible reaction pathways have been proposed.<sup>71,72</sup> (i)

The first step is to form electrochemically adsorbed hydrogen ( $H_{ads}$ , Volmer reaction):

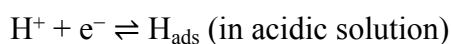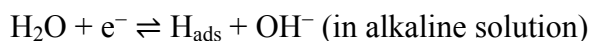

$$b = \frac{-2.303 \cdot R \cdot T}{\beta \cdot F} \approx -120 \text{ mV dec}^{-1}$$

where  $R$  is the ideal gas constant,  $T$  is the absolute temperature,  $\beta \approx 0.5$  is the symmetry coefficient, and  $F$  is the Faraday constant.

A different reaction step in the next pathway leads to a different HER mechanism. To be specific, (ii) the formed  $H_{ads}$  undergoes an electrochemical desorption step (Heyrovsky reaction):

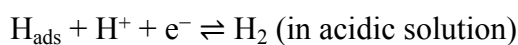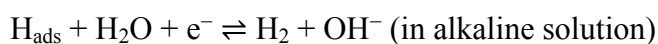

$$b = \frac{-2.303 \cdot R \cdot T}{(1 + \beta) \cdot F} \approx -40 \text{ mV dec}^{-1}$$

or a recombination step (Tafel reaction)

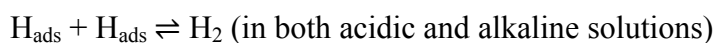

$$b = \frac{-2.303 \cdot R \cdot T}{2 \cdot F} \approx -30 \text{ mV dec}^{-1}$$

For Ru/MoS<sub>2</sub>/CP in this work, its Tafel slope in 1.0 M KOH was found to be  $-60 \text{ mV dec}^{-1}$ .

In fact, a Tafel slope of about  $-60 \text{ mV dec}^{-1}$  is commonly observed on Ru-based HER

catalysts.<sup>73-78</sup> It can be explained by a formal kinetics approach in two cases: (i) the Heyrovsky mechanism is operative and the adsorption of the reaction intermediate  $H_{ads}$  proceeds under Temkin conditions in the range of intermediate surface coverages  $0.2 < \theta < 0.8$ ;<sup>77,79</sup> (ii) the mechanism involves a surface chemical rearrangement step  $H_{ads}(A) \rightarrow H_{ads}(B)$  as the rate-determining step (RDS), which features the surface sites A and B having different energy levels.<sup>68,75,78,79</sup> The latter case supports the proposed hypothesis on the synergy between Ru and  $MoS_2$ . Accordingly, the following HER mechanism is predicted:

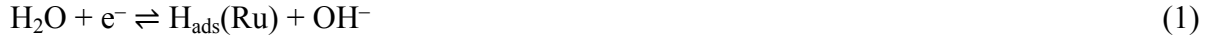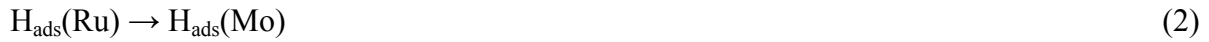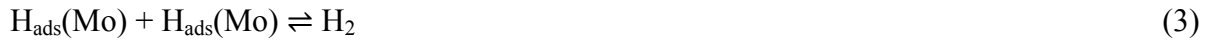

If Step 2 representing the surface diffusion of  $H_{ads}$  from the Ru sites to the nearby unsaturated Mo atoms of  $MoS_2$  is the RDS, the overall reaction rate is equal to:

$$-j = 2 \cdot F \cdot k_2 \cdot \theta(Ru) \cdot (1 - \theta(MoS_2)) \quad (4)$$

where  $k_{\pm i}$  is the rate constant of step i in the forward (+) or backward (-) direction and  $\theta$  the fractional occupancy of H-adsorption sites on Ru or  $MoS_2$ . If we assume that the Volmer step (Step 1) preceding the RDS is in quasi-equilibrium at low overpotentials, we obtain the following equation:

$$k_1 \cdot (1 - \theta(Ru)) \cdot e^{-\frac{\beta_1 \cdot F \cdot E}{R \cdot T}} = k_{-1} \cdot c(OH^-) \cdot \theta(Ru) \cdot e^{\frac{(1 - \beta_1) \cdot F \cdot E}{R \cdot T}} \quad (5)$$

where  $\beta$  is the symmetry factor. Since  $\theta(Ru)$  is close to 0 at low overpotentials, it can be approximated that  $(1 - \theta(Ru)) \rightarrow 1$ . In that case from Eq. 5, we obtain:

$$\theta(Ru) = \frac{k_1}{k_{-1}} \cdot \frac{1}{c(OH^-)} \cdot e^{-\frac{F \cdot E}{R \cdot T}} \quad (6)$$

Now, by replacing  $\theta(Ru)$  in the rate law of the total reaction (Eq. 4), we get:

$$-j = 2 \cdot F \cdot k_2 \cdot \frac{k_1}{k_{-1}} \cdot \frac{1}{c(OH^-)} \cdot e^{-\frac{F \cdot E}{R \cdot T}} \quad (7)$$

For  $T = 298$  K, the Tafel slope is:

$$b = -\frac{2.303 \cdot R \cdot T}{F} = -60 \text{ mV dec}^{-1} \quad (8)$$



Given that the theoretical Tafel slope is identical to the observed one on Ru/MoS<sub>2</sub>/CP (−60 mV dec<sup>−1</sup>), such a result further supports the interfacial synergy between Ru and MoS<sub>2</sub> towards improve alkaline HER kinetics.

Notably, the aforementioned mechanism could apply to Ru/MoS<sub>2</sub>/CP only at low overpotentials when  $\theta \rightarrow 0$  (at overpotentials lower than −25 mV according to Fig. 3b). At higher overpotentials, i.e. at higher current densities, where  $\theta \rightarrow 1$ , the reaction pathway involving Step 2 as the RDS reaches a reaction limiting current density,<sup>79</sup> and H desorption from the Ru sites dominantly proceeds through the Heyrovsky step:

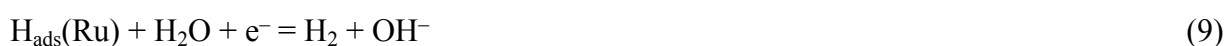

Under such conditions, the overall reaction rate is then given by:

$$-j = 2 \cdot F \cdot k_2 \cdot e^{-\frac{\beta_1 \cdot F \cdot E}{R \cdot T}} \quad (10)$$

For T = 298 K, assuming  $\beta_1 = 0.5$ , the theoretical Tafel slope is:

$$b = -\frac{2.303 \cdot R \cdot T}{\beta_1 \cdot F} = -120 \text{ mV dec}^{-1} \quad (11)$$

To this end, we also calculated the Tafel slope of Ru/MoS<sub>2</sub>/CP at higher overpotentials, as presented in Fig. S12. A Tafel slope of −122 mV dec<sup>−1</sup> is observed on Ru/MoS<sub>2</sub>/CP at high overpotentials, which is also consistent with the theoretically calculated slope. All these results further demonstrate the proposed alkaline HER mechanism on Ru/MoS<sub>2</sub>/CP.

## 5. Supplementary Movie

**Movie S1.** The self-supported Ru/MoS<sub>2</sub>/CP electrode is directly employed as the working electrode in a typical three-electrode cell setup using 1.0 M KOH as the electrolyte. H<sub>2</sub> bubbles are visibly observed on the Ru/MoS<sub>2</sub>/CP electrode at an overpotential of −15 mV. When the overpotential increases from −15 to −100 mV, the evolution rate of H<sub>2</sub> bubbles increases significantly, and the generated bubbles release quickly without obvious adherence on the electrode. No visible peeling of the active material from the electrode can be observed, reflecting remarkable structural robustness of the as-synthesized electrode.

## 6. References

- 1 J. Xie, J. Zhang, S. Li, F. Grote, X. Zhang, H. Zhang, R. Wang, Y. Lei, B. Pan and Y. Xie, *J. Am. Chem. Soc.*, 2013, **135**, 17881–17888.

- 2 H. Tributsch, *Ber. Bunsen-Ges.*, 1977, **81**, 361–369.
- 3 H. Yu, X. Yu, Y. Chen, S. Zhang, P. Gao and C. Li, *Nanoscale*, 2015, **7**, 8731–8738.
- 4 A. Li, Y. Hu, M. Yu, X. Liu and M. Li, *Int. J. Hydrogen Energy*, 2017, **42**, 9419–9427.
- 5 J. Mahmood, F. Li, S. M. Jung, M. S. Okyay, I. Ahmad, S. J. Kim, N. Park, H. Y. Jeong and J. B. Baek, *Nat. Nanotechnol.*, 2017, **12**, 441–446.
- 6 P. Jiang, Y. Yang, R. Shi, G. Xia, J. Chen, J. Su and Q. Chen, *J. Mater. Chem. A*, 2017, **5**, 5475–5485.
- 7 J. V. Medina-Flores, A. Manzo-Robledo, J. M. Mora-Hernández and E. M. Arce Estrada, *Int. J. Hydrogen Energy*, 2017, **42**, 38–45.
- 8 Y. Zheng, Y. Jiao, Y. Zhu, L. H. Li, Y. Han, Y. Chen, M. Jaroniec and S. Z. Qiao, *J. Am. Chem. Soc.*, 2016, **138**, 16174–16181.
- 9 Z. Chen, J. Lu, Y. Ai, Y. Ji, T. Adschiri and L. Wan, *ACS Appl. Mater. Interfaces*, 2016, **8**, 35132–35137.
- 10 L. Zhu, Q. Cai, F. Liao, M. Sheng, B. Wu and M. Shao, *Electrochem. Commun.*, 2015, **52**, 29–33.
- 11 R. K. Shervedani and A. Amini, *Carbon*, 2015, **93**, 762–773.
- 12 Y. Yang, K. Zhang, H. Lin, X. Li, H. C. Chan, L. Yang and Q. Gao, *ACS Catal.*, 2017, **7**, 2357–2366.
- 13 C. Wang, B. Tian, M. Wu and J. Wang, *ACS Appl. Mater. Interfaces*, 2017, **9**, 7084–7090.
- 14 S. Ravula, C. Zhang, J. B. Essner, J. D. Robertson, J. Lin and G. A. Baker, *ACS Appl. Mater. Interfaces*, 2017, **9**, 8065–8074.
- 15 X. Shang, W. H. Hu, X. Li, B. Dong, Y. R. Liu, G. Q. Han, Y. M. Chai and C. G. Liu, *Electrochim. Acta*, 2017, **224**, 25–31.
- 16 H. Yang, T. Zhang, H. Zhu, M. Zhang, W. Wu and M. Du, *Int. J. Hydrogen Energy*, 2017, **42**, 1912–1918.
- 17 I. Roger, R. Moca, H. N. Miras, K. G. Crawford, D. A. J. Moran, A. Y. Ganin and M. D. Symes, *J. Mater. Chem. A*, 2017, **5**, 1472–1480.
- 18 D. Wang, X. Zhang, S. Bao, Z. Zhang, H. Fei and Z. Wu, *J. Mater. Chem. A*, 2017, **5**, 2681–2688.
- 19 B. Guo, K. Yu, H. Li, R. Qi, Y. Zhang, H. Song, Z. Tang, Z. Zhu and M. Chen, *ACS Appl. Mater. Interfaces*, 2017, **9**, 3653–3660.
- 20 W. Li, F. Li, X. Wang, Y. Tang, Y. Yang, W. Gao and R. Li, *Appl. Surf. Sci.*, 2017, **401**, 190–197.

- 21 Y. Li, L. Wang, S. Zhang, X. Dong, Y. Song, T. Cai and Y. Liu, *Catal. Sci. Technol.*, 2017, **7**, 718–724.
- 22 J. Zhang, T. Wang, D. Pohl, B. Rellinghaus, R. Dong, S. Liu, X. Zhuang and X. Feng, *Angew. Chem. Int. Ed.*, 2016, **55**, 6702–6707.
- 23 T. An, Y. Wang, J. Tang, W. Wei, X. Cui, A. M. Alenizi, L. Zhang and G. Zheng, *J. Mater. Chem. A*, 2016, **4**, 13439–13443.
- 24 Z. Xing, X. Yang, A. M. Asiri and X. Sun, *ACS Appl. Mater. Interfaces*, 2016, **8**, 14521–14526.
- 25 A. Wu, C. Tian, H. Yan, Y. Jiao, Q. Yan, G. Yang and H. Fu, *Nanoscale*, 2016, **8**, 11052–11059.
- 26 Y. Luo, D. Huang, M. Li, X. Xiao, W. Shi, M. Wang, J. Su and Y. Shen, *Electrochim. Acta*, 2016, **219**, 187–193.
- 27 A. Jagminas, A. Naujokaitis, R. Žalneravičius, V. Jasulaitiene and G. Valušis, *Appl. Surf. Sci.*, 2016, **385**, 56–62.
- 28 W. Xiao, P. Liu, J. Zhang, W. Song, Y. P. Feng, D. Gao and J. Ding, *Adv. Energy Mater.*, 2017, **7**, 1602086.
- 29 L. Ma, L. Xu, W. Lin, Q. Li, X. Xu, X. Zhou and H. Li, *Adv. Powder Technol.*, 2016, **27**, 2153–2160.
- 30 L. Ma, L. Xu, X. Zhou, X. Xu, J. Luo and L. Zhang, *Colloids Surf. A*, 2016, **509**, 140–148.
- 31 J. Ye, W. Chen, S. Xu, Z. Yu and S. Hou, *RSC Adv.*, 2016, **6**, 104925–104932.
- 32 J. Xu, J. Cui, C. Guo, Z. Zhao, R. Jiang, S. Xu, Z. Zhuang, Y. Huang, L. Wang and Y. Li, *Angew. Chem. Int. Ed.*, 2016, **55**, 6502–6505.
- 33 Y. R. Liu, W. H. Hu, X. Li, B. Dong, X. Shang, G. Q. Han, Y. M. Chai, Y. Q. Liu and C. G. Liu, *Appl. Surf. Sci.*, 2016, **384**, 51–57.
- 34 Y. R. Liu, W. H. Hu, X. Li, B. Dong, X. Shang, G. Q. Han, Y. M. Chai, Y. Q. Liu and C. G. Liu, *Appl. Surf. Sci.*, 2016, **383**, 276–282.
- 35 J. N. He, Y. Q. Liang, J. Mao, X. M. Zhang, X. J. Yang, Z. D. Cui, S. L. Zhu, Z. Y. Li and B. B. Li, *J. Electrochem. Soc.*, 2016, **163**, H299–H304.
- 36 L. Ma, L. Xu, X. Xu, X. Zhou, J. Luo and L. Zhang, *Mater. Sci. Eng. B*, 2016, **212**, 30–38.
- 37 B. Konkena, J. Masa, W. Xia, M. Muhler and W. Schuhmann, *Nano Energy*, 2016, **29**, 46–53.
- 38 D. Wang, X. Zhang, Y. Shen and Z. Wu, *RSC Adv.*, 2016, **6**, 16656–16661.
- 39 Y. Yin, J. Han, Y. Zhang, X. Zhang, P. Xu, Q. Yuan, L. Samad, X. Wang, Y. Wang, Z. Zhang, P. Zhang, X. Cao, B. Song and S. Jin, *J. Am. Chem. Soc.*, 2016, **138**, 7965–7972.

- 40 A. Liu, L. Zhao, J. Zhang, L. Lin and H. Wu, *ACS Appl. Mater. Interfaces*, 2016, **8**, 25210–25218.
- 41 Y. J. Tang, Y. Wang, X. L. Wang, S. L. Li, W. Huang, L. Z. Dong, C. H. Liu, Y. F. Li and Y. Q. Lan, *Adv. Energy Mater.*, 2016, **6**, 1600116.
- 42 L. Yu, B. Y. Xia, X. Wang and X. W. Lou, *Adv. Mater.*, 2016, **28**, 92–97.
- 43 X. Dai, K. Du, Z. Li, M. Liu, Y. Ma, H. Sun, X. Zhang and Y. Yang, *ACS Appl. Mater. Interfaces*, 2015, **7**, 27242–27253.
- 44 M. R. Gao, J. X. Liang, Y. R. Zheng, Y. F. Xu, J. Jiang, Q. Gao, J. Li and S. H. Yu, *Nat. Commun.*, 2015, **6**, 5982.
- 45 S. Xu, D. Li and P. Wu, *Adv. Funct. Mater.*, 2015, **25**, 1127–1136.
- 46 J. Zhang, S. Liu, H. Liang, R. Dong and X. Feng, *Adv. Mater.*, 2015, **27**, 7426–7431.
- 47 H. Zhu, J. Zhang, R. Yanzhang, M. Du, Q. Wang, G. Gao, J. Wu, G. Wu, M. Zhang, B. Liu, J. Yao and X. Zhang, *Adv. Mater.*, 2015, **27**, 4752–4759.
- 48 Z. Huang, W. Luo, L. Ma, M. Yu, X. Ren, M. He, S. Polen, K. Click, B. Garrett, J. Lu, K. Amine, C. Hadad, W. Chen, A. Asthagiri and Y. Wu, *Angew. Chem. Int. Ed.*, 2015, **54**, 15181–15185.
- 49 X. Ren, Q. Ma, H. Fan, L. Pang, Y. Zhang, Y. Yao, X. Ren and S. Liu, *Chem. Commun.*, 2015, **51**, 15997–16000.
- 50 M. Chhetri, U. Gupta, L. Yadgarov, R. Rosentsveig, R. Tenne and C. N. R. Rao, *Dalton Trans.*, 2015, **44**, 16399–16404.
- 51 J. Deng, H. Li, J. Xiao, Y. Tu, D. Deng, H. Yang, H. Tian, J. Li, P. Ren and X. Bao, *Energy Environ. Sci.*, 2015, **8**, 1594–1601.
- 52 H. Zhang, Y. Li, T. Xu, J. Wang, Z. Huo, P. Wan and X. Sun, *J. Mater. Chem. A*, 2015, **3**, 15020–15023.
- 53 M. R. Gao, M. K. Y. Chan and Y. Sun, *Nat. Commun.*, 2015, **6**, 7493.
- 54 S. Chen, J. Duan, Y. Tang, B. Jin and S. Z. Qiao, *Nano Energy*, 2015, **11**, 11–18.
- 55 D. Gopalakrishnan, D. Damien, B. Li, H. Gullappalli, V. K. Pillai, P. M. Ajayan and M. M. Shaijumon, *Chem. Commun.*, 2015, **51**, 6293–6296.
- 56 F. Li, J. Li, X. Lin, X. Li, Y. Fang, L. Jiao, X. An, Y. Fu, J. Jin and R. Li, *J. Power Sources*, 2015, **300**, 301–308.
- 57 D. J. Li, U. N. Maiti, J. Lim, D. S. Choi, W. J. Lee, Y. Oh, G. Y. Lee and S. O. Kim, *Nano Lett.*, 2014, **14**, 1228–1233.
- 58 J. Kibsgaard and T. F. Jaramillo, *Angew. Chem. Int. Ed.*, 2014, **53**, 14433–14437.



- 59 Z. Lu, W. Zhu, X. Yu, H. Zhang, Y. Li, X. Sun, X. Wang, H. Wang, J. Wang, J. Luo, X. Lei and L. Jiang, *Adv. Mater.*, 2014, **26**, 2683–2687.
- 60 Y. Tan, P. Liu, L. Chen, W. Cong, Y. Ito, J. Han, X. Guo, Z. Tang, T. Fujita, A. Hirata and M. W. Chen, *Adv. Mater.*, 2014, **26**, 8023–8028.
- 61 M. A. Lukowski, A. S. Daniel, F. Meng, A. Forticaux, L. Li and S. Jin, *J. Am. Chem. Soc.*, 2013, **135**, 10274–10277.
- 62 Y. Li, H. Wang, L. Xie, Y. Liang, G. Hong and H. Dai, *J. Am. Chem. Soc.*, 2011, **133**, 7296–7299.
- 63 E. Gileadi, *Electrode Kinetics for Chemists, Chemical Engineers and Materials Scientists*, Wiley-VCH, New York, 1993.
- 64 A. J. Bard and L. R. Faulkner, *Electrochemical Methods: Fundamentals and Applications*, Wiley, New York, 2nd Edition, 2000.
- 65 C. C. L. McCrory, S. Jung, J. C. Peters and T. F. Jaramillo, *J. Am. Chem. Soc.*, 2013, **135**, 16977–16987.
- 66 S. Levine and A. L. Smith, *Discuss. Faraday Soc.*, 1971, **52**, 290–301.
- 67 B. M. Jović, V. D. Jović, U. Č. Lačnjevac, L. Gajić-Krstajić and N. V. Krstajić, *Int. J. Hydrogen Energy*, 2015, **40**, 10480–10490.
- 68 B. M. Jović, V. D. Jović, U. Č. Lačnjevac, S. I. Stevanović, J. Kovač, M. Radović and N. V. Krstajić, *J. Electroanal. Chem.*, 2016, **766**, 78–86.
- 69 G. J. Brug, A. L. G. van den Eeden, M. Sluyters-Rehbach and J. H. Sluyters, *J. Electroanal. Chem. Interfacial Electrochem.*, 1984, **176**, 275–295.
- 70 D. Lin and A. Lasia, *J. Electroanal. Chem.*, 2017, **785**, 190–195.
- 71 B. E. Conway and B. V. Tilak, *Electrochim. Acta*, 2002, **47**, 3571–3594.
- 72 Y. Zheng, Y. Jiao, M. Jaroniec and S. Z. Qiao, *Angew. Chem. Int. Ed.*, 2015, **54**, 52–65.
- 73 M. Fleischmann and M. Grenness, *J. Chem. Soc., Faraday Trans. 1*, 1972, **68**, 2305–2315.
- 74 V. S. Bagotzky, A. M. Skundin and E. K. Tuseeva, *Electrochim. Acta*, 1976, **21**, 29–36.
- 75 I. M. Kodintsev and S. Trasatti, *Electrochim. Acta*, 1994, **39**, 1803–1808.
- 76 A. C. Tavares and S. Trasatti, *Electrochim. Acta*, 2000, **45**, 4195–4202.
- 77 U. Č. Lačnjevac, B. M. Jović, V. D. Jović, V. R. Radmilović and N. V. Krstajić, *Int. J. Hydrogen Energy*, 2013, **38**, 10178–10190.
- 78 U. Č. Lačnjevac, V. V. Radmilović, V. R. Radmilović and N. V. Krstajić, *Electrochim. Acta*, 2015, **168**, 178–190.
- 79 A. Kahyarian, B. Brown and S. Nesic, *J. Electrochem. Soc.*, 2017, **164**, H365–H374.
